# Supplementary material
Source: publisher figshare collection journal article supplement (https://sage.figshare.com/ndownloader/files/13262237)
Supplement: Supplementary file 1 [file 13262237]

## **Appendix 1**

### **Isolation and Culture of Degenerative Tenocytes from Human Rotator Cuff Tendons.**

Tendon tissues 3 x 3mm in size were harvested from patients undergoing arthroscopic rotator cuff repair, washed twice in calcium-and magnesium-free phosphate-buffered saline (DPBS) and finely minced into 1 to 2mm fragments (n=3). Cells were isolated by treating with 0.3% collagenase II for 2 hours in Dulbecco's modified Eagle medium (DMEM) containing antibiotic solution (100 U/mL penicillin and 100 mg/mL streptomycin) with gentle agitation. After the same volume of DPBS was added, undigested tissue was removed using a 100-mm nylon sieve, and cells were collected by centrifugation, washed twice, resuspended in DMEM supplemented with 10% fetal bovine serum (FBS) and antibiotic solution (growth medium), and seeded in 100-mm tissue culture dishes at a density of  $2 \text{ to } 5 \times 10^4$  cells/cm<sup>2</sup> at 37°C in a humidified 5% CO<sub>2</sub> atmosphere. The medium was replaced every 2 to 3 days. When cells reached 60% to 80% confluence, they were detached by incubation for 5 minutes with 0.25% trypsin (Welgene, Daegu, Korea), washed, and then replated at a ratio of 1:3.

## **Appendix 2**

### **Quantification of growth factors using ELISA.**

The levels of EGF (Human EGF Quantikine ELISA Kit, DEG00; R&D Systems, Minneapolis, Minnesota), TGF- $\beta$ 1 (Human TGF- $\beta$ 1 Quantikine ELISA Kit, DB100B; R&D Systems), VEGF (Human VEGF Quantikine ELISA Kit, DVE00; R&D Systems), bFGF (Human FGF basic Quantikine HS ELISA Kit, HSFB00D; R&D Systems), PDGF-AB (Human PDGF-AB Quantikine ELISA Kit, DHD00C; R&D Systems), IGF-1 (Human IGF-1 Quantikine ELISA Kit, DG100; R&D Systems), and CTGF (Human CTGF ELISA Kit, SK00726-01; Aviscera Bioscience, Santa Clara, California) in PPP and PRPs were measured with use of commercially available ELISA kits. All experiments were performed in duplicate according to manufacturer's instructions. The optical densities of the microplate wells were measured with a microplate reader (SpectraMax Plus384; Molecular Devices, Sunnyvale, California). Sample concentrations were obtained by interpolating from the standard curve.

### Appendix 3

#### Real-time reverse transcriptase polymerase chain reaction (RT-PCR).

Total RNA was extracted from tenocytes seeded at a density of  $2 \times 10^4$  cells/cm<sup>2</sup> in the 6-well plate (SPL Lifesciences, Pocheon, Korea) using a HiYield Total RNA mini kit (Real Biotech Corporation, Taiwan) quantified using a NanoDrop ND-100 spectrophotometer (NanoDrop, Wilmington, Delaware). First-strand complementary DNA (cDNA) was synthesized using the Superscript III Reverse Transcription kit (Invitrogen, Carlsbad, California). Briefly, first-strand cDNA was synthesized from cellular RNAs (1 ug) by heating a mixture (1 ug RNA, 1 uL Oligo(dT)20 [50 uM], 1 uL dNTP [10 mM], and up to 10 uL DW) to 65°C for 5 minutes, cooling on ice for 2 minutes, and then adding a mixture containing 2 uL 10X RT buffer, 4 uL MgCl<sub>2</sub> (25 mM), 2 uL DTT (0.1 M), 1 uL RNaseOut (40 U/mL), and 1 uL Superscript III Reverse Transcriptase (200 U/mL) (Invitrogen). The reaction mixture was held at 50°C for 50 minutes to promote cDNA synthesis, and the reaction was terminated by heating to 85°C for 5 minutes and then cooling on ice for 2 minutes. Finally, RNase H (1 uL, 2 U/mL) was added and incubated at 37°C for 20 minutes to remove RNA strands from RNA-cDNA hybrids. Synthesized cDNA was used for real-time RT-PCR. To perform real-time PCR utilizing a LightCycler 480 (Roche Applied Science, Mannheim, Germany), Taq-Man Gene Expression Assays (Applied Biosystems, Foster City, California) were used as a probe/primer set specified for IL-1 $\beta$  (assay ID: Hs99999029\_m1), IL-6 (assay ID: Hs99999032\_m1), COX-2 (assay ID: Hs00153133\_m1), mPGES-1 (assay ID: Hs00610420\_m1), TNF- $\alpha$  (assay ID: Hs99999043\_m1), MMP-1 (assay ID: Hs00899658\_m1), MMP-3 (assay ID: Hs00968308\_m1), MMP-9 (assay ID: Hs00957555\_m1), MMP-13 (assay ID: Hs00233992\_m1), TIMP-1 (assay ID: Hs99999139\_m1), TIMP-3 (assay ID: Hs00165949\_m1), ADAMTS-4 (assay ID: Hs00192708\_m1), ADAMTS-5 (assay ID: Hs00199841\_m1), IL-4 (assay ID: Hs00174122\_m1), IL-10 (assay ID: Hs00961622\_m1), VIP (assay ID: Hs00175021\_m1), IL-1RN (assay ID: Hs00893626\_m1), type I collagen (assay ID: Hs00164004\_m1), type III collagen (assay ID: Hs00943809\_m1), decorin (assay ID: Hs00754870\_s1), tenascin-C (assay ID: Hs00233648\_m1), and GAPDH (assay ID: Hs99999905\_m1). The PCRs were performed in a final volume of 20 uL containing 10 uL 2X LightCycler480 Probes Master (FastStart Taq DNA polymerase, reaction buffer, dNTP mix [with dUTP instead of dTTP], and 6.4 mM MgCl<sub>2</sub>) (Roche Applied Science), 1 uL TaqMan Gene Expression Assay (Applied Biosystems), 5 uL cDNA as the template, and 4 uL H<sub>2</sub>O using the following program: 95°C for 10 minutes, 60 cycles at 95°C for 10 seconds, and 60°C for 1

minute, followed by 72°C for 4 seconds, and a final cooling at 40°C for 30 seconds. Gene expressions were normalized versus GAPDH as follows: the cycle number at which the transcript of each gene was detectable (threshold cycle, Ct) was normalized against the Ct of GAPDH, which is referred to as  $\Delta Ct$ . Gene expressions relative to GAPDH are expressed as  $2^{-\Delta Ct}$ , where  $\Delta Ct = C_T \text{ gene of interest} - C_T \text{ GAPDH}$ .

#### Appendix 4

##### Western blotting.

Cell protein extracts were prepared from tenocytes seeded at a density of  $2 \times 10^4$  cells/cm<sup>2</sup> in the 6-well plate using PRO-PREP™ protein extraction solution (iNtRON, Sungnam, Korea). Equal amounts of protein extracts for each group were electrophoresed into 10% SDS-PAGE gels. The electrophoresed proteins were blotted onto a PVDF membrane with 0.45µm pore size. The membranes were blocked with TBS-T buffer containing 5% skim milk or 5% BSA for 1 hour at room temperature in 1X Tris-buffered saline with 0.1% tween 20 (TBS-T) followed by incubation with primary antibody overnight at 4°C. Primary antibodies were as follows : MMP-1 antibody (#MAB901, R&D Systems), MMP-3 antibody (#MAB905, R&D Systems), MMP-9 antibody (#2270, Cell signaling technology), MMP13 antibody (ab75606, abcam), ADAMTS-4 antibody (ab84792, abcam), ADAMTS-5 antibody (ab41037, abcam), TIMP-1 antibody (#8946, Cell signaling technology), TIMP-3 antibody (#ab39184, abcam), β-actin antibody (#sc47778, Santa Cruz Biotechnology). The membranes were washed with TBS-T, and incubated with HRP-conjugated secondary antibody diluted 1:4,000 for 45 minutes. After washing with 1X TBS containing 0.1% Tween 20 (TBS-T), the membranes were scanned using ImageQuant LAS4000 mini (GE Healthcare Life Sciences, Little Chalfont, UK). Densitometric quantitation was analyzed with ImageQuant LAS4000 mini. The protein synthesis levels were normalized to those of beta-actin. Western blotting was also performed with PPP and PRPs to identify proteins in themselves.

Effects of PRP on protein synthesis of degradative enzymes & their inhibitors with or without IL-1 $\beta$  treatment.

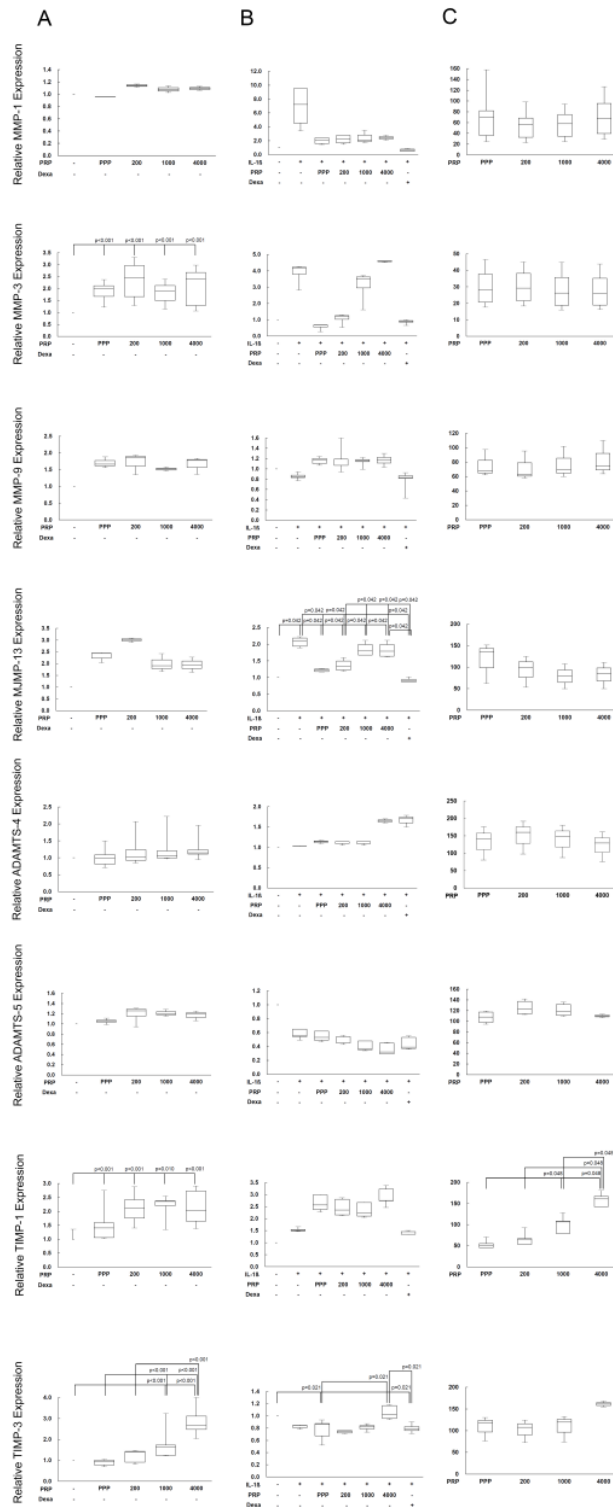

## Appendix 6

Change of pain after PRP injection.

| Variable       | PRP (n=17) |   |     | P Value | Steroid (n=17) |   |     | P Value | P Value |
|----------------|------------|---|-----|---------|----------------|---|-----|---------|---------|
| Pain at rest   |            |   |     |         |                |   |     |         |         |
| Preinjection   | 2.3        | ± | 1.7 |         | 2.6            | ± | 2.2 |         | .812    |
| 1W             | 2.4        | ± | 1.8 | .776    | 1.4            | ± | 1.9 | .012    | .045    |
| 1M             | 1.5        | ± | 1.7 | .105    | 1.2            | ± | 1.5 | .012    | .518    |
| 3M             | 1.8        | ± | 1.8 | .396    | 1.9            | ± | 2.5 | .275    | .760    |
| 6M             | 0.8        | ± | 1.5 | .004    | 1.5            | ± | 2.5 | .056    | .474    |
| Pain on motion |            |   |     |         |                |   |     |         |         |
| Preinjection   | 4.5        | ± | 1.6 |         | 4.1            | ± | 1.8 |         | .610    |
| 1W             | 3.2        | ± | 1.8 | .006    | 2.2            | ± | 1.8 | .000    | .205    |
| 1M             | 2.5        | ± | 1.7 | .002    | 1.8            | ± | 1.8 | .001    | .634    |
| 3M             | 2.4        | ± | 1.5 | .001    | 2.9            | ± | 2.6 | .038    | .518    |
| 6M             | 1.5        | ± | 1.4 | .000    | 2.4            | ± | 2.5 | .032    | .454    |
| Pain at night  |            |   |     |         |                |   |     |         |         |
| Preinjection   | 4.5        | ± | 2.4 |         | 4.9            | ± | 2.5 |         | .496    |
| 1W             | 4.1        | ± | 2.2 | .372    | 3.2            | ± | 2.7 | .003    | .150    |
| 1M             | 2.9        | ± | 1.7 | .016    | 2.5            | ± | 1.9 | .001    | .231    |
| 3M             | 3          | ± | 2.1 | .039    | 2.8            | ± | 2.9 | .037    | .306    |
| 6M             | 1.8        | ± | 2.2 | .004    | 3.2            | ± | 3.0 | .014    | .375    |
| Mean pain      |            |   |     |         |                |   |     |         |         |
| Preinjection   | 3.8        | ± | 1.4 |         | 3.9            | ± | 1.7 |         | .786    |
| 1W             | 3.2        | ± | 1.5 | .120    | 2.2            | ± | 1.7 | .000    | .014    |
| 1M             | 2.3        | ± | 1.4 | .003    | 1.9            | ± | 1.5 | .001    | .231    |
| 3M             | 2.4        | ± | 1.6 | .002    | 2.7            | ± | 2.6 | .065    | .375    |
| 6M             | 1.4        | ± | 1.6 | .000    | 2.5            | ± | 2.5 | .017    | .433    |
| Worst pain     |            |   |     |         |                |   |     |         |         |
| Preinjection   | 7.5        | ± | 1.5 |         | 7.2            | ± | 1.7 |         | .586    |
| 1W             | 6.3        | ± | 1.8 | .004    | 5.5            | ± | 2.2 | .003    | .586    |
| 1M             | 4.5        | ± | 2.2 | .001    | 4.4            | ± | 2.7 | .001    | .734    |
| 3M             | 4.4        | ± | 2.5 | .001    | 3.9            | ± | 3.5 | .002    | .786    |
| 6M             | 3.6        | ± | 2.7 | .001    | 4.4            | ± | 3.6 | .004    | .205    |

## Appendix 7

Change of ROM and strength after PRP injection.

| Variable                                    | PRP (n=17) |   |      | P Value | Steroid (n=17) |   |      | P Value | P Value |
|---------------------------------------------|------------|---|------|---------|----------------|---|------|---------|---------|
| Forward flexion, deg                        |            |   |      |         |                |   |      |         |         |
| Preinjection                                | 162.4      | ± | 19.5 |         | 162.6          | ± | 12.1 |         | .540    |
| 1W                                          | 168.2      | ± | 11.7 | .083    | 167.1          | ± | 10.0 | .085    | .586    |
| 1M                                          | 168.8      | ± | 13.6 | .059    | 164.4          | ± | 13.2 | .473    | .496    |
| 3M                                          | 166.8      | ± | 15.1 | .222    | 163.0          | ± | 13.9 | .446    | .708    |
| 6M                                          | 167.1      | ± | 15.1 | .461    | 159.7          | ± | 14.5 | .728    | .306    |
| Abduction, deg                              |            |   |      |         |                |   |      |         |         |
| Preinjection                                | 167.1      | ± | 17.1 |         | 165.9          | ± | 11.5 |         | .474    |
| 1W                                          | 167.1      | ± | 21.6 | .757    | 170.6          | ± | 9.0  | .021    | .245    |
| 1M                                          | 161.8      | ± | 32.3 | .505    | 170.6          | ± | 11.3 | .063    | .586    |
| 3M                                          | 162.9      | ± | 29.5 | .721    | 168.3          | ± | 11.1 | .264    | .760    |
| 6M                                          | 165.0      | ± | 23.8 | .906    | 163.8          | ± | 12.0 | .682    | .540    |
| External rotation with arm at the side, deg |            |   |      |         |                |   |      |         |         |
| Preinjection                                | 52.9       | ± | 15.7 |         | 47.6           | ± | 10.0 |         | .306    |
| 1W                                          | 55.3       | ± | 16.6 | .354    | 49.1           | ± | 11.5 | .334    | .812    |
| 1M                                          | 53.8       | ± | 18.2 | .813    | 48.5           | ± | 15.4 | .673    | 1.000   |
| 3M                                          | 53.2       | ± | 16.8 | .905    | 51.3           | ± | 14.7 | .412    | .708    |
| 6M                                          | 53.2       | ± | 16.6 | .648    | 45.9           | ± | 14.5 | .836    | .474    |
| Internal rotation, vertebral level          |            |   |      |         |                |   |      |         |         |
| Preinjection                                | 11.2       | ± | 2.3  |         | 10.6           | ± | 2.6  |         | .540    |
| 1W                                          | 11.1       | ± | 2.6  | .914    | 10.9           | ± | 2.2  | .380    | .760    |
| 1M                                          | 11.2       | ± | 2.1  | .943    | 11.3           | ± | 1.8  | .135    | .160    |
| 3M                                          | 11.1       | ± | 2.2  | .931    | 11.4           | ± | 1.8  | .053    | .394    |
| 6M                                          | 11.8       | ± | 1.7  | .147    | 11.4           | ± | 1.5  | .054    | .708    |
| Supraspinatus, lb                           |            |   |      |         |                |   |      |         |         |
| Preinjection                                | 9.6        | ± | 5.0  |         | 10.6           | ± | 5.9  |         | .812    |
| 1W                                          | 9.0        | ± | 4.1  | .245    | 11.6           | ± | 5.9  | .179    | .122    |
| 1M                                          | 12.0       | ± | 5.2  | .076    | 12.0           | ± | 5.1  | .063    | .634    |
| 3M                                          | 13.8       | ± | 6.0  | .003    | 10.4           | ± | 5.3  | .460    | .022    |
| 6M                                          | 13.5       | ± | 5.7  | .010    | 10.7           | ± | 4.5  | .623    | .002    |
| Infraspinatus, lb                           |            |   |      |         |                |   |      |         |         |
| Preinjection                                | 9.7        | ± | 3.8  |         | 9.0            | ± | 4.9  |         | .474    |
| 1W                                          | 9.6        | ± | 2.7  | .586    | 10.4           | ± | 4.8  | .088    | .259    |
| 1M                                          | 10.6       | ± | 3.2  | .163    | 10.7           | ± | 3.5  | .041    | .973    |
| 3M                                          | 12.6       | ± | 5.3  | .005    | 9.8            | ± | 4.6  | .600    | .022    |
| 6M                                          | 11.0       | ± | 3.3  | .124    | 9.8            | ± | 3.9  | .205    | .518    |
| Subscapularis, lb                           |            |   |      |         |                |   |      |         |         |
| Preinjection                                | 13.3       | ± | 5.6  |         | 12.5           | ± | 4.4  |         | .838    |



|                                   |                     |   |     |      |                          |   |     |         |      |
|-----------------------------------|---------------------|---|-----|------|--------------------------|---|-----|---------|------|
| 1W                                | 13.5                | ± | 5.0 | .394 | 13.7                     | ± | 4.9 | .435    | .919 |
| 1M                                | 14.7                | ± | 6.1 | .093 | 15.7                     | ± | 5.3 | .033    | .892 |
| 3M                                | 16.3                | ± | 5.4 | .016 | 15.0                     | ± | 6.1 | .484    | .073 |
| 6M                                | 16.1                | ± | 5.8 | .007 | 14.5                     | ± | 5.1 | .301    | .193 |
| Variable                          | Affected side(n=17) |   |     |      | Contralateral side(n=17) |   |     | P Value |      |
| Supraspinatus, lb (PRP group)     |                     |   |     |      |                          |   |     |         |      |
| Preinjection                      | 9.6                 | ± | 5.0 |      | 12.9                     | ± | 4.8 |         | .045 |
| 1W                                | 9.0                 | ± | 4.1 |      | 12.8                     | ± | 4.4 |         | .009 |
| 1M                                | 12.0                | ± | 5.2 |      | 13.7                     | ± | 4.7 |         | .205 |
| 3M                                | 13.8                | ± | 6.0 |      | 15.4                     | ± | 5.2 |         | .394 |
| 6M                                | 13.5                | ± | 5.7 |      | 14.7                     | ± | 4.3 |         | .433 |
| Infraspinatus, lb (PRP group)     |                     |   |     |      |                          |   |     |         |      |
| Preinjection                      | 9.7                 | ± | 3.8 |      | 10.8                     | ± | 3.2 |         | .322 |
| 1W                                | 9.6                 | ± | 2.7 |      | 10.8                     | ± | 2.3 |         | .218 |
| 1M                                | 10.6                | ± | 3.2 |      | 11.9                     | ± | 3.0 |         | .245 |
| 3M                                | 12.6                | ± | 5.3 |      | 12.7                     | ± | 4.7 |         | .734 |
| 6M                                | 11.0                | ± | 3.3 |      | 12.6                     | ± | 3.6 |         | .394 |
| Subscapularis, lb (PRP group)     |                     |   |     |      |                          |   |     |         |      |
| Preinjection                      | 13.3                | ± | 5.6 |      | 14.9                     | ± | 4.9 |         | .170 |
| 1W                                | 13.5                | ± | 5.0 |      | 15.4                     | ± | 5.1 |         | .182 |
| 1M                                | 14.7                | ± | 6.1 |      | 16.5                     | ± | 5.6 |         | .290 |
| 3M                                | 16.3                | ± | 5.4 |      | 17.1                     | ± | 4.6 |         | .634 |
| 6M                                | 16.1                | ± | 5.8 |      | 16.3                     | ± | 6.4 |         | .683 |
| Supraspinatus, lb (Steroid group) |                     |   |     |      |                          |   |     |         |      |
| Preinjection                      | 10.6                | ± | 5.9 |      | 13.2                     | ± | 5.5 |         | .131 |
| 1W                                | 11.6                | ± | 5.9 |      | 13.7                     | ± | 5.0 |         | .182 |
| 1M                                | 12.0                | ± | 5.1 |      | 13.8                     | ± | 4.4 |         | .246 |
| 3M                                | 10.4                | ± | 5.3 |      | 14.0                     | ± | 4.4 |         | .102 |
| 6M                                | 10.7                | ± | 4.5 |      | 14.3                     | ± | 4.1 |         | .023 |
| Infraspinatus, lb (Steroid group) |                     |   |     |      |                          |   |     |         |      |
| Preinjection                      | 9.0                 | ± | 4.9 |      | 11.2                     | ± | 4.6 |         | .122 |
| 1W                                | 10.4                | ± | 4.8 |      | 11.3                     | ± | 4.2 |         | .496 |
| 1M                                | 10.7                | ± | 3.5 |      | 11.5                     | ± | 3.3 |         | .539 |
| 3M                                | 9.8                 | ± | 4.6 |      | 11.8                     | ± | 4.1 |         | .336 |
| 6M                                | 9.8                 | ± | 3.9 |      | 11.8                     | ± | 3.9 |         | .196 |
| Subscapularis, lb (Steroid group) |                     |   |     |      |                          |   |     |         |      |
| Preinjection                      | 12.5                | ± | 4.4 |      | 16.4                     | ± | 5.2 |         | .041 |
| 1W                                | 13.7                | ± | 4.9 |      | 17.1                     | ± | 4.2 |         | .079 |
| 1M                                | 15.7                | ± | 5.3 |      | 18.5                     | ± | 4.1 |         | .202 |
| 3M                                | 15.0                | ± | 6.1 |      | 18.3                     | ± | 6.3 |         | .223 |
| 6M                                | 14.5                | ± | 5.1 |      | 16.8                     | ± | 4.7 |         | .210 |

## Appendix 8

Change of ASES, Constant, UCLA, DASH, SST, and SPADI Scores after PRP injection.

| Variable     | PRP (n=17) |   |      | P Value | Steroid (n=17) |   |      | P Value | P Value |
|--------------|------------|---|------|---------|----------------|---|------|---------|---------|
| ASES         |            |   |      |         |                |   |      |         |         |
| Preinjection | 65.0       | ± | 10.7 |         | 64.3           | ± | 12.1 |         | .634    |
| 1W           | 66.5       | ± | 12.8 | .623    | 76.0           | ± | 14.2 | 0.000   | .002    |
| 1M           | 75.3       | ± | 13.4 | .005    | 82.3           | ± | 13.8 | 0.000   | .049    |
| 3M           | 74.5       | ± | 16.6 | .013    | 75.9           | ± | 23.3 | 0.044   | .586    |
| 6M           | 85.3       | ± | 12.6 | .000    | 77.6           | ± | 22.2 | 0.017   | .193    |
| Constant     |            |   |      |         |                |   |      |         |         |
| Preinjection | 65.7       | ± | 9.3  |         | 64.3           | ± | 11.6 |         | .563    |
| 1W           | 67.7       | ± | 8.5  | .193    | 72.7           | ± | 11.8 | 0.006   | .062    |
| 1M           | 72.0       | ± | 11.0 | .039    | 73.7           | ± | 10.3 | 0.005   | .563    |
| 3M           | 75.5       | ± | 13.3 | .010    | 69.4           | ± | 14.7 | 0.125   | .357    |
| 6M           | 79.1       | ± | 9.2  | .001    | 71.4           | ± | 14.1 | 0.074   | .160    |
| UCLA         |            |   |      |         |                |   |      |         |         |
| Preinjection | 20.6       | ± | 3.8  |         | 19.9           | ± | 3.2  |         | .474    |
| 1W           | 23.9       | ± | 4.7  | .012    | 25.6           | ± | 4.5  | 0.001   | .150    |
| 1M           | 25.5       | ± | 4.4  | .005    | 27.3           | ± | 4.2  | 0.001   | .306    |
| 3M           | 24.3       | ± | 5.6  | .026    | 22.8           | ± | 10.9 | 0.170   | .563    |
| 6M           | 27.2       | ± | 5.7  | .005    | 25.1           | ± | 8.9  | 0.014   | .634    |
| DASH         |            |   |      |         |                |   |      |         |         |
| Preinjection | 25.1       | ± | 12.3 |         | 23.0           | ± | 8.8  |         | .683    |
| 1W           | 26.4       | ± | 13.5 | .794    | 18.9           | ± | 10.9 | 0.038   | .041    |
| 1M           | 22.1       | ± | 12.9 | .102    | 13.4           | ± | 9.3  | 0.004   | .026    |
| 3M           | 20.8       | ± | 14.8 | .149    | 15.4           | ± | 24.0 | 0.218   | .540    |
| 6M           | 13.5       | ± | 10.7 | .001    | 16.9           | ± | 22.6 | 0.149   | .634    |
| SST          |            |   |      |         |                |   |      |         |         |
| Preinjection | 7.4        | ± | 2.7  |         | 7.5            | ± | 2.0  |         | .812    |
| 1W           | 7.6        | ± | 2.5  | .324    | 8.5            | ± | 2.2  | 0.086   | .634    |
| 1M           | 8.6        | ± | 2.4  | .034    | 10.4           | ± | 3.2  | 0.002   | .182    |
| 3M           | 8.9        | ± | 2.4  | .074    | 7.8            | ± | 4.2  | 0.571   | .518    |
| 6M           | 10.5       | ± | 3.8  | .015    | 8.7            | ± | 3.9  | 0.139   | .496    |
| SPADI        |            |   |      |         |                |   |      |         |         |
| Preinjection | 36.5       | ± | 14.3 |         | 34.4           | ± | 11.3 |         | .838    |
| 1W           | 32.8       | ± | 15.5 | .407    | 20.8           | ± | 12.3 | 0.000   | .009    |
| 1M           | 23.3       | ± | 14.9 | .002    | 16.7           | ± | 11.2 | 0.000   | .231    |
| 3M           | 24.5       | ± | 19.5 | .006    | 20.0           | ± | 23.0 | 0.026   | .357    |
| 6M           | 14.5       | ± | 12.2 | .000    | 20.5           | ± | 22.5 | 0.014   | .290    |

ASES, American Shoulder and Elbow Surgeons; UCLA, University of California, Los Angeles; DASH, Disability Assessment of Shoulder and Hand; SST, Simple Shoulder Test; SPADI, Shoulder Pain and Disability Index

## Appendix 9

Overall function and satisfaction after PRP injection.

| Variable             | PRP (n=17) |   |      | <i>P</i> Value | Steroid (n=17) |   |      | <i>P</i> Value | <i>P</i> Value |
|----------------------|------------|---|------|----------------|----------------|---|------|----------------|----------------|
| Overall function     |            |   |      |                |                |   |      |                |                |
| Preinjection         | 5.5        | ± | 1.2  |                | 5.8            | ± | 2.3  |                | .433           |
| 1W                   | 5.7        | ± | 1.4  | .382           | 6.2            | ± | 1.5  | .544           | .973           |
| 1M                   | 5.9        | ± | 1.6  | .299           | 6.4            | ± | 1.5  | .255           | .708           |
| 3M                   | 5.9        | ± | 2.2  | .472           | 5.2            | ± | 3.3  | .483           | .290           |
| 6M                   | 7.1        | ± | 1.8  | .004           | 5.7            | ± | 3.1  | .695           | .029           |
| Overall satisfaction |            |   |      |                |                |   |      |                |                |
| 1W                   | 58.8       | ± | 26.6 | NA             | 62.4           | ± | 28.2 | NA             | .610           |
| 1M                   | 69.7       | ± | 25.2 | NA             | 68.8           | ± | 20.9 | NA             | .973           |
| 3M                   | 61.2       | ± | 27.4 | NA             | 59.4           | ± | 35.1 | NA             | .892           |
| 6M                   | 76.8       | ± | 20.2 | NA             | 60.6           | ± | 33.1 | NA             | .160           |
